# Supplementary material for: Detection and Characterization of Leptospira Infection and Exposure in Rats on the Caribbean Island of Saint Kitts
Source: MDPI journal article supplement (doi:10.3390/ani10020350), 2020-02-22
Supplement: s1 [file s1]

# Detection and characterization of *Leptospira* infection and exposure in rats in the Caribbean island of Saint Kitts

Sreekumari Rajeev, Kanae Shiokawa, Alejandro Llanes, Malavika Rajeev, Carlos Mario Restrepo, Raymond Chin, Eymi Michelle Cedeño and Esteban Ellis

**Table S1.** General features of sequenced genomes and genetic variants for *Leptospira* isolates.

| Isolate | Species <sup>a</sup> | Host | Serogroup | Size (Mb) | GC%  | Total number of variants <sup>b</sup> | Variants within coding sequences <sup>b</sup> | Genbank accession <sup>c</sup> |
|---------|----------------------|------|-----------|-----------|------|---------------------------------------|-----------------------------------------------|--------------------------------|
| R6      | LB                   | RR   | Ballum    | 4.1       | 40.0 | 166                                   | 97                                            | CP047372<br>CP047373           |
| R6L     | LB                   | RR   | Ballum    | 4.1       | 40.1 | 166                                   | 97                                            | CP047520<br>CP047521           |
| R7      | LI                   | RN   | Ictero    | 4.7       | 35.1 | 194                                   | 38                                            | CP047512<br>CP047513           |
| R11     | LI                   | RN   | Ictero    | 4.7       | 35.1 | 200                                   | 41                                            | CP047510<br>CP047511           |
| R12     | LI                   | RN   | Ictero    | 4.7       | 35.1 | 192                                   | 39                                            | CP047508<br>CP047509           |
| R13     | LI                   | RN   | Ictero    | 4.7       | 35.1 | 204                                   | 43                                            | CP047506<br>CP047507           |
| R13L    | LI                   | RN   | Ictero    | 4.7       | 35.1 | 195                                   | 43                                            | CP047518<br>CP047519           |
| R14     | LB                   | RN   | Ballum    | 4.0       | 40.1 | 156                                   | 90                                            | CP047504<br>CP047505           |
| R14L    | LB                   | RN   | Ballum    | 4.0       | 40.0 | 157                                   | 91                                            | CP047516<br>CP047517           |
| R16     | LI                   | RN   | Ictero    | 4.7       | 35.1 | 203                                   | 42                                            | CP047502<br>CP047503           |
| R17     | LI                   | RN   | Ictero    | 4.7       | 35.2 | 202                                   | 44                                            | CP047500<br>CP047501           |
| R19     | LI                   | RN   | Ictero    | 4.7       | 35.1 | 201                                   | 43                                            | CP047514<br>CP047515           |
| R21     | LI                   | RN   | Ictero    | 4.7       | 35.2 | 202                                   | 42                                            | CP047498<br>CP047499           |
| R22     | LI                   | RN   | Ictero    | 4.7       | 35.1 | 198                                   | 41                                            | CP047496<br>CP047497           |
| R23     | LB                   | RR   | Ballum    | 4.0       | 40.0 | 155                                   | 90                                            | CP047370<br>CP047371           |
| R28     | LB                   | RR   | Ballum    | 4.1       | 40.0 | 164                                   | 93                                            | CP047332<br>CP047333           |
| R29     | LB                   | RR   | Ballum    | 4.1       | 40.0 | 158                                   | 90                                            | CP047330,<br>CP047331          |

<sup>a</sup> For isolates with evidence of mixed infection, only the genome for the species with the higher percentage of reads in the sample was considered. <sup>b</sup> Including both single nucleotide polymorphisms (SNP) and small insertion/deletions (indels) up to 3 bp. <sup>c</sup> Chromosomes I and II, in that order. LI = *L. interrogans*; LB = *L. borgpetersenii*; MM = *M. musculus*; RN = *R. norvegicus*; RR = *R. rattus*; Ictero = Icterohaemorrhagiae

**Table S2.** Test results from individual animals, including collection date and site.

| ID  | Spp | Date     | Site <sup>1</sup> | Sex | Age | DFA | RT-PCR | C <sub>t</sub> value | Culture | MAT results | MAT Titers |        |             |             |        |
|-----|-----|----------|-------------------|-----|-----|-----|--------|----------------------|---------|-------------|------------|--------|-------------|-------------|--------|
|     |     |          |                   |     |     |     |        |                      |         |             | Mankarso   | Ictero | Copenhageni | Grippyphosa | Wolffi |
| R1  | RN  | 03/04/17 | B                 | F   | M   | 0   | 1      | 30.21                | 0       | 1           | 50         | 0      | 0           | 0           | 0      |
| R2  | RR  | 03/07/17 | A                 | F   | M   | 0   | 0      | 40                   | 0       | 1           | 0          | 50     | 0           | 0           | 0      |
| R3  | RR  | 03/07/17 | A                 | M   | J   | 0   | 1      | 38.49                | 0       | 1           | 0          | 50     | 0           | 0           | 0      |
| R4  | RR  | 03/07/17 | A                 | M   | J   | 0   | 0      | 40                   | 0       | 1           | 0          | 50     | 0           | 0           | 0      |
| R5  | RR  | 03/08/17 | A                 | M   | M   | 0   | 0      | 40                   | 0       | 1           | 0          | 50     | 0           | 0           | 0      |
| R6  | RR  | 03/08/17 | A                 | M   | M   | 0   | 1      | 36.03                | 1       | 0           | 0          | 0      | 0           | 0           | 0      |
| R7  | RN  | 03/14/17 | B                 | F   | M   | 1   | 1      | 29.94                | 1       | 1           | 0          | 400    | 200         | 0           | 0      |
| R8  | RN  | 03/17/17 | B                 | F   | J   | 0   | 0      | 40                   | 0       | 0           | 0          | 0      | 0           | 0           | 0      |
| R9  | RR  | 03/18/17 | D                 | F   | M   | 0   | 0      | 40                   | 0       | 1           | 0          | 50     | 0           | 0           | 0      |
| R10 | RN  | 03/25/17 | B                 | F   | M   | 0   | 0      | 40                   | 0       | 1           | 0          | 200    | 0           | 0           | 0      |
| R11 | RN  | 04/03/17 | C                 | M   | M   | 1   | 1      | 21.78                | 1       | 1           | 0          | 200    | 200         | 0           | 0      |
| R12 | RN  | 04/03/17 | C                 | M   | M   | 1   | 1      | 32.34                | 1       | 1           | 0          | 50     | 0           | 0           | 0      |
| R13 | RN  | 04/03/17 | C                 | F   | M   | 1   | 1      | 19.32                | 1       | 1           | 0          | 1600   | 0           | 0           | 0      |
| R14 | RN  | 04/04/17 | C                 | M   | M   | 1   | 1      | 18.11                | 1       | 1           | 0          | 1600   | 200         | 0           | 0      |
| R15 | RR  | 04/04/17 | C                 | M   | M   | 0   | 0      | 40                   | 0       | 1           | 0          | 50     | 0           | 0           | 0      |
| R16 | RN  | 04/06/17 | C                 | M   | M   | 1   | 1      | 21.23                | 1       | 1           | 0          | 800    | 200         | 0           | 0      |
| R17 | RN  | 04/07/17 | C                 | F   | M   | 1   | 1      | 28.64                | 1       | 1           | 0          | 100    | 0           | 0           | 0      |
| R18 | RN  | 04/07/17 | C                 | M   | J   | 0   | 0      | 40                   | 0       | 1           | 0          | 50     | 0           | 0           | 0      |
| R19 | RN  | 04/07/17 | C                 | F   | M   | 1   | 1      | 26.13                | 1       | 1           | 0          | 100    | 0           | 0           | 0      |
| R20 | RN  | 04/12/17 | C                 | F   | M   | 0   | 0      | 40                   | 0       | 0           | 0          | 0      | 0           | 0           | 0      |
| R21 | RN  | 04/12/17 | C                 | M   | J   | 0   | 0      | 40                   | 1       | 1           | 0          | 400    | 0           | 50          | 0      |
| R22 | RN  | 04/13/17 | C                 | F   | M   | 1   | 1      | 29.11                | 1       | 1           | 0          | 200    | 0           | 0           | 0      |
| R23 | RR  | 04/14/17 | C                 | F   | M   | 0   | 1      | 31.61                | 1       | 1           | 50         | 200    | 0           | 50          | 100    |
| R24 | RR  | 04/14/17 | C                 | F   | M   | 0   | 0      | 40                   | 0       | 1           | 0          | 50     | 0           | 0           | 0      |
| R25 | RN  | 04/25/17 | C                 | M   | M   | 0   | 1      | 28.79                | 0       | 1           | 0          | 200    | 0           | 0           | 0      |
| R26 | RN  | 04/25/17 | C                 | M   | M   | 0   | 0      | 40                   | 0       | 0           | 0          | 0      | 0           | 0           | 0      |
| R27 | RN  | 04/26/17 | C                 | M   | M   | 0   | 1      | 38.99                | 0       | 1           | 0          | 50     | 0           | 0           | 0      |
| R28 | RR  | 04/27/17 | C                 | F   | M   | 1   | 1      | 21.24                | 1       | 1           | 50         | 100    | 0           | 0           | 0      |
| R29 | RR  | 04/27/17 | C                 | M   | M   | 1   | 1      | 26.94                | 1       | 1           | 50         | 200    | 0           | 0           | 0      |

<sup>1</sup> Sites according labels from Figure S1. Species: RN = *Rattus norvegicus*, RR = *Rattus rattus*;

Age: M = Mature, J = Juvenile; Ictero: Icterohaemorrhagiae; 0 = Negative, 1= positive;

Ct value: Cycle threshold for PCR

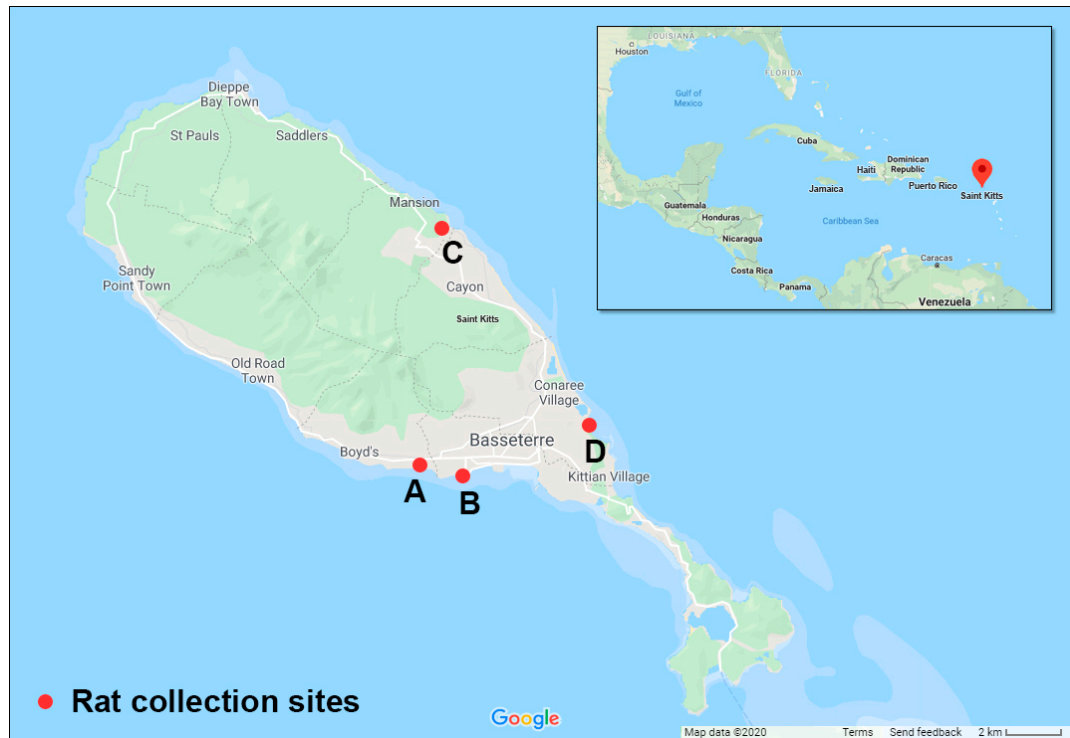

**Figure S1.** Geographic location of rat collection sites in the island of Saint Kitts. A – Esteridge, B – Basseterre, C – Dewars State, D – Half Moon Bay.

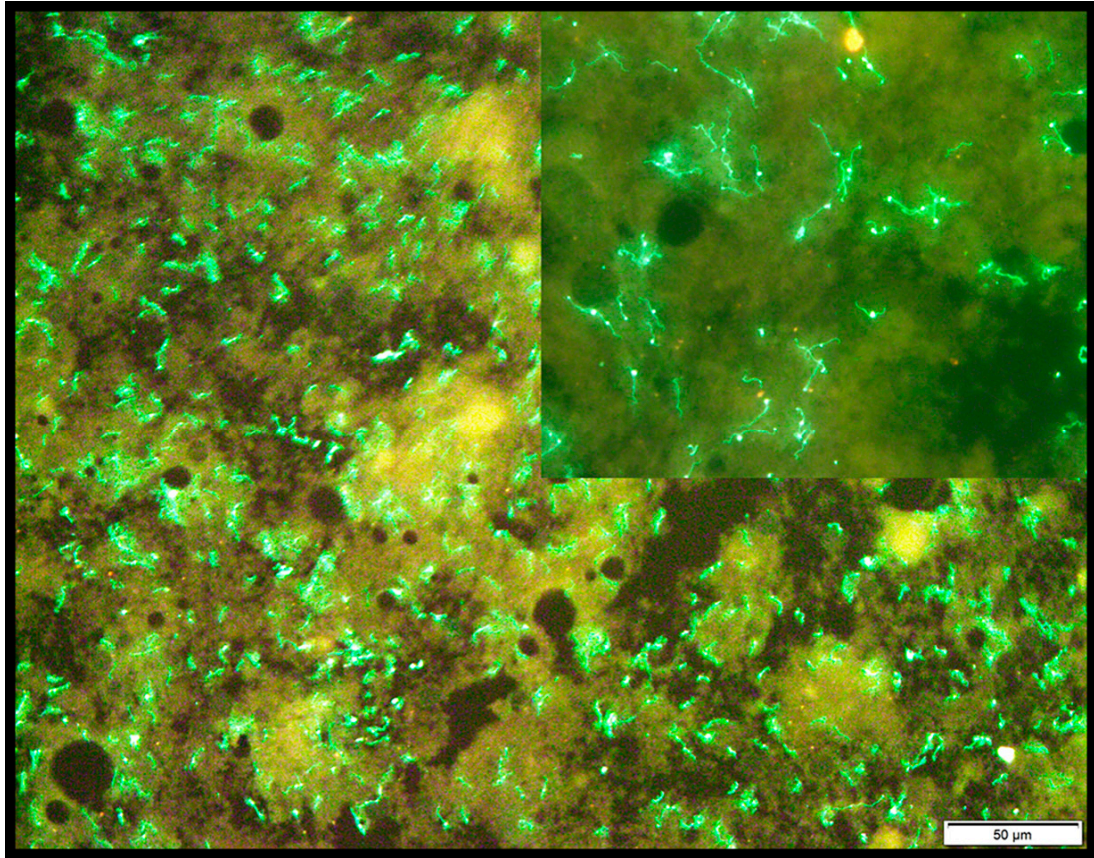

**Figure S2. Direct immunofluorescence assay (DFA) of a representative rat kidney.** Main figure shows numerous fluorescent organisms with morphology compatible with *Leptospira* under 20× magnification of a fluorescent microscope. Inset is the same at 40× magnification.

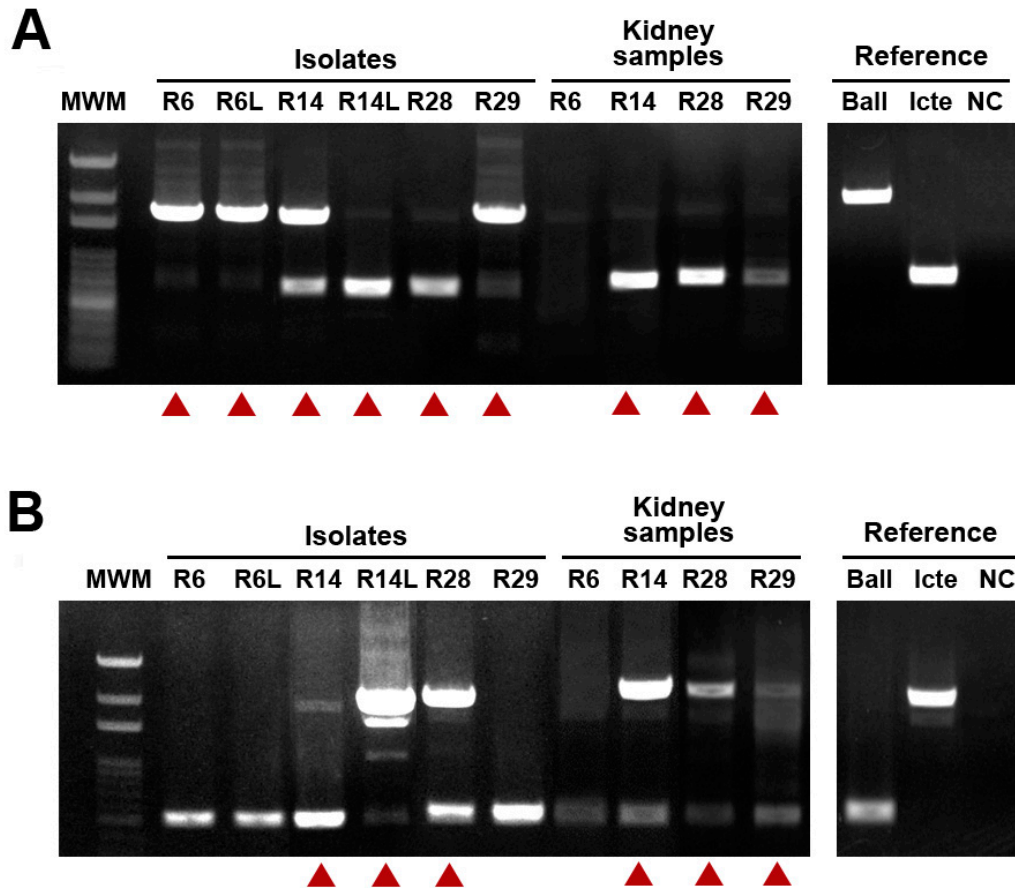

**Figure S3. PCR amplification of potential species-specific sequences from isolates and original kidney samples.** Figure shows agarose gels stained with ethidium bromide, ran under the same conditions for amplification products of **(A)** IS1500 and **(B)** IS1533. Reference strains for *L. borgpetersenii* serogroup Ballum (Ball) and *L. interrogans* serogroup Icterohaemorrhagiae (Icte) are also included, along with a negative control (NC). Samples with evidence of mixed infection are indicated with red triangles. These are samples for which a band corresponding to a different species was observed alone or in addition to the one for the expected species.
